# Supplementary material
Source: PubMed Central journal article supplement (PMC11117155)
Supplement: jama-e248469-s001.pdf [file jama-e248469-s001.pdf]

## Supplemental Online Content

Wen Y, Mansour SG, Srialluri N, et al. Kidney transplant outcomes from deceased donors who received dialysis. *JAMA*. Published online May 23, 2024. doi:10.1001/jama.2024.8469

**eTable 1.** Characteristics of all deceased donors receiving vs. not receiving dialysis with kidney procured

**eTable 2.** Characteristics of deceased donors receiving dialysis with vs. without kidney transplanted

**eTable 3.** Recipient kidney function at 6 and 12 months after kidney transplant from matched donors receiving vs. not receiving dialysis

**eTable 4.** Recipient kidney function at 6 and 12 months after kidney transplant from matched donors receiving vs. not receiving dialysis using alternative imputation approaches

**eTable 5.** Recipient kidney function decline after kidney transplantation from matched donors receiving vs. not receiving dialysis

**eTable 6.** Recipient outcomes after kidney transplantation from matched donors receiving vs. not receiving dialysis stratified by donor dialysis modality and duration

**eTable 7.** Recipient outcomes after kidney transplantation from all donors receiving and not receiving dialysis

**eTable 8.** Recipient kidney function decline after kidney transplantation from all donors receiving vs. not receiving dialysis

This supplemental material has been provided by the authors to give readers additional information about their work.

**eTable 1.** Characteristics of all deceased donors receiving vs. not receiving dialysis with kidney procured

| Donor characteristics <sup>a</sup>                 |                    | Donors receiving dialysis (N=805) | Donors not receiving dialysis (N=56,871) | Standardized mean difference |
|----------------------------------------------------|--------------------|-----------------------------------|------------------------------------------|------------------------------|
| Age, year                                          |                    | 35.2 (12.2)                       | 41.5 (14.7)                              | 0.46                         |
| Female sex                                         |                    | 306 (38%)                         | 22816 (40.1%)                            | -0.043                       |
| Black race <sup>c</sup>                            |                    | 133 (16.5%)                       | 8337 (14.7%)                             | 0.051                        |
| BMI, kg/m <sup>2</sup>                             |                    | 29.8 (7.1)                        | 28.4 (6.8)                               | 0.21                         |
| Admission eGFR, ml/min/1.73m <sup>2</sup>          |                    | 63.6 (31.1)                       | 85.8 (25.6)                              | -0.78                        |
| Serum creatinine, mg/dL, median (IQR)              | Admission          | 1.4 (1, 2)                        | 1 (0.8, 1.3)                             | 0.71                         |
|                                                    | Peak               | 4.7 (2.6, 6.7)                    | 1.4 (1, 1.8)                             | 1.5                          |
|                                                    | Terminal           | 2.7 (1.5, 4.3)                    | 1 (0.7, 1.4)                             | 1.07                         |
| Dialysis indication                                | AKI                | 663 (82.4%)                       | 0                                        | NA                           |
|                                                    | Intoxication       | 83 (10.3%)                        | 0                                        |                              |
|                                                    | Other <sup>b</sup> | 59 (7.3%)                         | 0                                        |                              |
| Dialysis modality                                  | Hemodialysis       | 313 (38.9%)                       | 0                                        | NA                           |
|                                                    | CRRT               | 456 (56.6%)                       | 0                                        |                              |
|                                                    | Both               | 25 (3.1%)                         | 0                                        |                              |
|                                                    | Unknown            | 11 (1.4%)                         | 0                                        |                              |
| Duration of dialysis                               | ≤3 days            | 578 (71.8%)                       | 0                                        | NA                           |
|                                                    | 4-7 days           | 147 (18.3%)                       | 0                                        |                              |
|                                                    | > 7 days           | 46 (5.7%)                         | 0                                        |                              |
|                                                    | Unknown            | 34 (4.2%)                         | 0                                        |                              |
| Number of vasopressors and inotropes, median (IQR) |                    | 1 (0, 1)                          | 0 (0, 1)                                 | 0.21                         |
| Hypertension                                       |                    | 206 (25.6%)                       | 19125 (33.6%)                            | 0.18                         |
| Diabetes                                           |                    | 85 (10.6%)                        | 5921 (10.4%)                             | -0.0048                      |
| Donation after cardiac death                       |                    | 56 (7%)                           | 8357 (14.7%)                             | -0.25                        |
| Stroke as cause of death                           |                    | 91 (11.3%)                        | 17820 (31.3%)                            | -0.5                         |
| Hepatitis C status                                 |                    | 21 (2.6%)                         | 2967 (5.2%)                              | -0.13                        |
| KDPI                                               |                    | 43.7 (23.7)                       | 48.6 (28.4)                              | 0.19                         |
| Number of kidney biopsies, median (IQR)            |                    | 2 (2, 2)                          | 2 (0, 2)                                 | <0.001                       |
| Number of kidneys transplanted per donor           | 0                  | 282 (35%)                         | 8438 (14.8%)                             | 0.48                         |
|                                                    | 1                  | 77 (9.6%)                         | 5377 (9.5%)                              | 0.0038                       |
|                                                    | 2                  | 446 (55.4%)                       | 43056 (75.7%)                            | -0.44                        |
| Year of transplant                                 | 2010-2014          | 200 (24.8%)                       | 27211 (47.8%)                            | -0.49                        |
|                                                    | 2015-2016          | 240 (29.8%)                       | 13855 (24.4%)                            | 0.12                         |
|                                                    | 2017-2018          | 365 (45.3%)                       | 15795 (27.8%)                            | 0.37                         |

Abbreviation: BMI, body mass index; eGFR, estimated glomerular filtration rate; KDPI, kidney donor profile index.

a. Descriptive variables are presented as mean (standard deviation), median (IQR), and N (proportion).

b. Other includes dialysis for severe hyperkalemia, acidosis, hypervolemia, hyperammonemia, and other electrolyte abnormalities without laboratory evidence of stage 2-3 AKI.

c. Race as reported by donor family and electronic health records

**eTable 2.** Characteristics of deceased donors receiving dialysis with vs. without kidney transplanted

| Donor characteristics <sup>a</sup>                             |                          | Donors receiving dialysis with at least one kidney transplanted (N=523) | Donors receiving dialysis without kidney transplanted (N=282) | Standardized mean difference |
|----------------------------------------------------------------|--------------------------|-------------------------------------------------------------------------|---------------------------------------------------------------|------------------------------|
| <b>Age, year</b>                                               |                          | 32.9 (10.8)                                                             | 39.6 (13.3)                                                   | -0.56                        |
| <b>Female sex</b>                                              |                          | 207 (39.6%)                                                             | 99 (35.1%)                                                    | 0.093                        |
| <b>Black race<sup>c</sup></b>                                  |                          | 78 (14.9%)                                                              | 55 (19.5%)                                                    | -0.12                        |
| <b>BMI, kg/m<sup>2</sup></b>                                   |                          | 29.5 (7.1)                                                              | 30.5 (7.1)                                                    | -0.15                        |
| <b>Admission eGFR, ml/min/1.73m<sup>2</sup></b>                |                          | 65.9 (31)                                                               | 59.3 (30.8)                                                   | 0.21                         |
| <b>Serum creatinine, mg/dL, median (IQR)</b>                   | <b>Admission</b>         | 1.4 (1, 2)                                                              | 1.4 (1.1, 2.2)                                                | -0.19                        |
|                                                                | <b>Peak</b>              | 4.2 (2.1, 6.3)                                                          | 5.3 (3.7, 7.1)                                                | -0.39                        |
|                                                                | <b>Terminal</b>          | 2.3 (1.2, 4)                                                            | 3.1 (2, 4.6)                                                  | -0.27                        |
| <b>Dialysis indication</b>                                     | <b>AKI</b>               | 400 (76.5%)                                                             | 263 (93.3%)                                                   | -0.48                        |
|                                                                | <b>Intoxication</b>      | 72 (13.8%)                                                              | 11 (3.9%)                                                     | 0.35                         |
|                                                                | <b>Other<sup>b</sup></b> | 51 (9.8%)                                                               | 8 (2.8%)                                                      | 0.29                         |
| <b>Dialysis modality</b>                                       | <b>Hemodialysis</b>      | 205 (39.2%)                                                             | 108 (38.3%)                                                   | 0.018                        |
|                                                                | <b>CRRT</b>              | 294 (56.2%)                                                             | 162 (57.4%)                                                   | -0.025                       |
|                                                                | <b>Both</b>              | 15 (2.9%)                                                               | 10 (3.5%)                                                     | -0.038                       |
|                                                                | <b>Unknown</b>           | 9 (1.7%)                                                                | 2 (0.7%)                                                      | 0.092                        |
| <b>Duration of dialysis</b>                                    | <b>≤3 days</b>           | 376 (71.9%)                                                             | 202 (71.6%)                                                   | 0.0058                       |
|                                                                | <b>4-7 days</b>          | 104 (19.9%)                                                             | 43 (15.2%)                                                    | 0.12                         |
|                                                                | <b>&gt; 7 days</b>       | 22 (4.2%)                                                               | 24 (8.5%)                                                     | -0.18                        |
|                                                                | <b>Unknown</b>           | 21 (4%)                                                                 | 13 (4.6%)                                                     | -0.029                       |
| <b>Number of vasopressors and inotropes used, median (IQR)</b> |                          | 0 (0, 1)                                                                | 1 (0, 1)                                                      | -0.25                        |
| <b>Number of kidneys placed on pump, median (IQR)</b>          |                          | 0 (0, 1)                                                                | 0 (0, 0)                                                      | 0.45                         |
| <b>Hypertension</b>                                            |                          | 100 (19.1%)                                                             | 106 (37.6%)                                                   | -0.42                        |
| <b>Diabetes</b>                                                |                          | 39 (7.5%)                                                               | 46 (16.3%)                                                    | -0.28                        |
| <b>Donation after cardiac death</b>                            |                          | 39 (7.5%)                                                               | 17 (6%)                                                       | 0.057                        |
| <b>Stroke as cause of death</b>                                |                          | 37 (7.1%)                                                               | 54 (19.1%)                                                    | -0.36                        |
| <b>Hepatitis C status</b>                                      |                          | 11 (2.1%)                                                               | 10 (3.5%)                                                     | -0.087                       |
| <b>Year of transplant</b>                                      | <b>2010-2014</b>         | 145 (27.7%)                                                             | 55 (19.5%)                                                    | 0.19                         |
|                                                                | <b>2015-2016</b>         | 148 (28.3%)                                                             | 92 (32.6%)                                                    | -0.094                       |
|                                                                | <b>2017-2018</b>         | 230 (44%)                                                               | 135 (47.9%)                                                   | -0.078                       |

Abbreviation: BMI, body mass index; CRRT, continuous renal replacement therapy; eGFR, estimated glomerular filtration rate.

a. Descriptive variables are presented as mean (standard deviation), median (IQR), and N (proportion).

b. Other includes dialysis for severe hyperkalemia, acidosis, hypervolemia, hyperammonemia, and other electrolyte abnormalities without laboratory evidence of stage 2-3 AKI.

c. Race as reported by donor family and electronic health records

**eTable 3.** Recipient kidney function at 6 and 12 months after kidney transplant from matched donors receiving vs. not receiving dialysis

| Recipient eGFR <sup>a</sup> , ml/min/1.73m <sup>2</sup> | Recipients of matched donors receiving dialysis, mean (SD), N | Recipients of matched donors not receiving dialysis, mean (SD), N | Adjusted coefficient for % difference <sup>b</sup> (95% CI) |
|---------------------------------------------------------|---------------------------------------------------------------|-------------------------------------------------------------------|-------------------------------------------------------------|
| <b>6 months</b>                                         | 63.3 (21.4), N= 912                                           | 64.4 (21.8), N= 879                                               | -0.33%<br>(-4.02%, 3.51%)                                   |
| <b>12 months</b>                                        | 64.7 (21), N=888                                              | 65.1 (22.2), N=853                                                | 0.51%<br>(-3.26%, 4.42%)                                    |

a. For recipients who developed graft failure before the 6- and 12-month timepoint, eGFR was imputed as 10 ml/min/1.73m<sup>2</sup>. For recipients who died before the 6- and 12-month timepoint, their last eGFR was carried forward. A total of 153 (7.8%) and 203 (10.4%) recipients had missing 6- and 12-month eGFR and did not have graft failure, thus were not included in this analysis.

b. Multiple linear regression models adjusted for cold ischemic time, recipient age, BMI, diabetes as the cause of recipient ESKD, preemptive transplant status, previous kidney transplant, HLA mismatch level, panel reactive antibody categories (0%, 1-20%, 21-80%, and >80%), donor admission eGFR. Sandwich estimators are used to account for pairs of donor kidneys. In these models, eGFR was log<sub>2</sub> transformed, and coefficients were converted to percentage difference for interpretation.

**eTable 4.** Recipient kidney function at 6 and 12 months after kidney transplant from matched donors receiving vs. not receiving dialysis using alternative imputation approaches

| eGFR imputation methods to account for recipient deaths | No imputation (i.e. For recipients that died, no eGFR was carried forward) |                                                                   |                                                             |
|---------------------------------------------------------|----------------------------------------------------------------------------|-------------------------------------------------------------------|-------------------------------------------------------------|
| Recipient eGFR <sup>a</sup> , ml/min/1.73m <sup>2</sup> | Recipients of matched donors receiving dialysis, mean (SD), N              | Recipients of matched donors not receiving dialysis, mean (SD), N | Adjusted coefficient for % difference <sup>b</sup> (95% CI) |
| <b>6 months</b>                                         | 63.3 (21.4), N= 912                                                        | 64.3 (21.8), N= 877                                               | -0.24%<br>(-3.93%, 3.6%)                                    |
| <b>12 months</b>                                        | 64.7 (21), N=887                                                           | 65.3 (22), N=845                                                  | 0.2%<br>(-3.55%, 4.08%)                                     |
| eGFR imputation methods to account for recipient deaths | Imputed as 1ml/min/1.73m <sup>2</sup>                                      |                                                                   |                                                             |
| Recipient eGFR <sup>c</sup> , ml/min/1.73m <sup>2</sup> | Recipients of matched donors receiving dialysis, mean (SD), N              | Recipients of matched donors not receiving dialysis, mean (SD), N | Adjusted coefficient for % difference <sup>b</sup> (95% CI) |
| <b>6 months</b>                                         | 63.3 (21.4), N= 912                                                        | 64.2 (22), N= 879                                                 | 0.67%<br>(-3.22%, 4.71%)                                    |
| <b>12 months</b>                                        | 64.6 (21.1), N=888                                                         | 64.7 (22.8), N=853                                                | 3.82%<br>(-0.97%, 8.83%)                                    |

a. For recipients who developed graft failure before the 6- and 12-month timepoint, eGFR was imputed as 10 ml/min/1.73m<sup>2</sup>. Recipients who died before the 6- and 12-month timepoint were not included even if they had eGFR measured or developed graft failure and died at these timepoints.

b. Multiple linear regression models adjusted for cold ischemic time, recipient age, BMI, diabetes as the cause of recipient ESKD, preemptive transplant status, previous kidney transplant, HLA mismatch level, panel reactive antibody categories (0%, 1-20%, 21-80%, and >80%), donor admission eGFR. Sandwich estimators are used to account for pairs of donor kidneys. In these models, eGFR was log<sub>2</sub> transformed, and coefficients were converted to percentage difference for interpretation.

c. For recipients who developed graft failure before the 6- and 12-month timepoint, eGFR was imputed as 10 ml/min/1.73m<sup>2</sup>. For recipients who died before the 6- and 12-month timepoint, eGFR was imputed as 1 ml/min/1.73m<sup>2</sup>.

**eTable 5.** Recipient kidney function decline after kidney transplantation from matched donors receiving vs. not receiving dialysis

|                                                                          |                      | Median (IQR) number of eGFR measurements per person | Median (IQR) duration from transplant to last eGFR measurements (year) | Annual eGFR decline <sup>a,b</sup> |                                   |
|--------------------------------------------------------------------------|----------------------|-----------------------------------------------------|------------------------------------------------------------------------|------------------------------------|-----------------------------------|
|                                                                          |                      |                                                     |                                                                        | % change per year                  | Difference between group (95% CI) |
| Recipients of matched donors not receiving dialysis (N=917) <sup>c</sup> |                      | 3 (2, 5)                                            | 2 (1, 4)                                                               | -4.48%                             | Reference                         |
| Recipients of donors receiving dialysis (n=944) <sup>c</sup>             |                      | 4 (2, 5)                                            | 2.4 (1.1, 4)                                                           | -3.2%                              | 1.28% (-0.66%, 3.25%)             |
| Stratified by dialysis indication                                        | AKI (N=720)          | 3.5 (2, 5)                                          | 2.2 (1.1, 3.9)                                                         | -2.5%                              | 1.97% (-5.8%, 4.12%)              |
|                                                                          | Intoxication (N=133) | 5 (3, 6)                                            | 3.2 (2, 5)                                                             | -6.48%                             | -2.01% (-0.13%, 1.43%)            |
|                                                                          | Other (N=91)         | 3 (2, 4)                                            | 2 (1, 2.9)                                                             | -2.02%                             | 2.45% (-5.33%, 7.86%)             |
| Stratified by dialysis modality                                          | HD (N=376)           | 4 (3, 5)                                            | 2.8 (1.6, 4)                                                           | -4.78%                             | -0.31% (-6.79%, 2.17%)            |
|                                                                          | CRRT (N=529)         | 3 (2, 5)                                            | 2 (1, 3.8)                                                             | -1.93%                             | 2.54% (-2.61%, 4.97%)             |
|                                                                          | Both (N=24)          | 4 (2.75, 5.25)                                      | 3 (1.3, 4.1)                                                           | -3.1%                              | 1.37% (-6.64%, 10.07%)            |
|                                                                          | Unknown (N=15)       | 6 (4.5, 9)                                          | 5.7 (3.4, 8.7)                                                         | -0.54%                             | 3.94% (-4.55%, 13.18%)            |
| Stratified by dialysis duration                                          | ≤3 days (N=689)      | 4 (2, 5)                                            | 2.6 (1.1, 4)                                                           | -3.48%                             | 1.01% (-1.08%, 3.13%)             |
|                                                                          | 4-7 days (N=181)     | 3 (2, 5)                                            | 2 (1, 3.9)                                                             | -0.5%                              | 3.99% (0.39%, 7.72%)              |
|                                                                          | >7 days (N=39)       | 4 (2.5, 5.5)                                        | 2.9 (1.1, 4.1)                                                         | -6.91%                             | -2.42% (-8.55%, 4.12%)            |
|                                                                          | Unknown (N=35)       | 4 (3, 6)                                            | 3.1 (1.4, 5)                                                           | -5.15%                             | -0.66% (-6.98%, 6.09%)            |

a. Linear mixed-effects models are used to estimate kidney function decline over time, interaction terms between donor dialysis status and time are used to determine the difference in the rate of kidney function decline between recipients from donors receiving dialysis vs. matched donors not receiving dialysis. The fixed-effects coefficients of time factor in linear mixed-effects models represent % change per year in recipients of matched donors not receiving dialysis, and the linear combination of the fixed-effects coefficients of time and time-dialysis interactions represent % change per year in recipients of donors receiving dialysis.

b. For recipients who developed graft failure, eGFR was imputed as 10 ml/min/1.73m<sup>2</sup> at the time of graft failure; for recipients who developed primary nonfunctioning, eGFR was imputed as 10 ml/min/1.73m<sup>2</sup> at the time of transplant.

c. In the UNOS Kidney-Pancreas Individual Follow-up data released in July 2023, 73 (7.4%) recipients of matched donors not receiving dialysis and 10 (1.0%) recipients of matched donors receiving dialysis had no follow up creatinine, did not develop graft failure and did not die before last follow-up, thus, were excluded from the longitudinal analysis.

**eTable 6.** Recipient outcomes after kidney transplantation from matched donors receiving vs. not receiving dialysis stratified by donor dialysis modality and duration

| Recipient outcomes           |                           | Recipients from matched donors not receiving dialysis (N=990) | Recipients from matched donors receiving dialysis (N=539) |                   |                    |                   |                                              |                    |                   |                   |
|------------------------------|---------------------------|---------------------------------------------------------------|-----------------------------------------------------------|-------------------|--------------------|-------------------|----------------------------------------------|--------------------|-------------------|-------------------|
|                              |                           |                                                               | Stratified by dialysis modality <sup>a</sup>              |                   |                    |                   | Stratified by dialysis duration <sup>a</sup> |                    |                   |                   |
|                              |                           |                                                               | HD (N=379)                                                | CRRT (N=534)      | Both (N=25)        | Unknown (N=16)    | ≤ 3 days (N=698)                             | 4-7 days (N=181)   | >7 days (N=40)    | Unknown (N=35)    |
| DGF                          | N (%)                     | 244 (24.6%)                                                   | 195 (51.5%)                                               | 344 (64.4%)       | 17 (68%)           | 9 (56.2%)         | 393 (56.3%)                                  | 132 (72.9%)        | 22 (55%)          | 18 (51.4%)        |
|                              | aOR <sup>b</sup> (95% CI) | Reference                                                     | 3.01 (2.21, 4.09)                                         | 5.24 (3.98, 6.9)  | 7.56 (2.84, 20.11) | 3.5 (1.01, 12.14) | 3.8 (2.95, 4.9)                              | 6.91 (4.59, 10.38) | 3.87 (1.69, 8.9)  | 2.91 (1.13, 7.55) |
| All-cause graft failure      | N (%)                     | 153 (15.5%)                                                   | 61 (16.1%)                                                | 69 (12.9%)        | 5 (20%)            | 3 (18.8%)         | 109 (15.6%)                                  | 15 (8.3%)          | 6 (15%)           | 8 (22.9%)         |
|                              | Incidence, per 1000 py    | 46.9                                                          | 45.8                                                      | 41.2              | 56.5               | 28.3              | 46.1                                         | 27                 | 43                | 56.8              |
|                              | aHR <sup>b</sup> (95% CI) | Reference                                                     | 0.98 (0.71, 1.36)                                         | 0.85 (0.62, 1.15) | 0.94 (0.34, 2.61)  | 0.64 (0.23, 1.8)  | 0.98 (0.75, 1.27)                            | 0.49 (0.27, 0.88)  | 0.88 (0.35, 2.2)  | 1.27 (0.6, 2.7)   |
| Death-censored graft failure | N (%)                     | 67 (6.8%)                                                     | 34 (9%)                                                   | 35 (6.6%)         | 2 (8%)             | 1 (6.2%)          | 55 (7.9%)                                    | 10 (5.5%)          | 3 (7.5%)          | 4 (11.4%)         |
|                              | Incidence, per 1000 py    | 20.6                                                          | 25.5                                                      | 20.9              | 22.6               | 9.4               | 23.3                                         | 18                 | 21.5              | 28.4              |
|                              | aHR <sup>b</sup> (95% CI) | Reference                                                     | 1.34 (0.87, 2.06)                                         | 1.1 (0.72, 1.68)  | 1.35 (0.37, 4.92)  | 0.45 (0.06, 3.56) | 1.23 (0.85, 1.79)                            | 0.9 (0.45, 1.81)   | 1.04 (0.34, 3.19) | 1.51 (0.51, 4.48) |
| Mortality                    | N (%)                     | 102 (10.3%)                                                   | 33 (8.7%)                                                 | 41 (7.7%)         | 4 (16%)            | 3 (18.8%)         | 66 (9.5%)                                    | 7 (3.9%)           | 3 (7.5%)          | 5 (14.3%)         |
|                              | Incidence, per 1000 py    | 30.8                                                          | 24                                                        | 23.8              | 42.9               | 28.3              | 27                                           | 12.3               | 21.1              | 34.9              |
|                              | aHR <sup>b</sup> (95% CI) | Reference                                                     | 0.76 (0.5, 1.15)                                          | 0.73 (0.49, 1.09) | 0.82 (0.26, 2.55)  | 1.11 (0.39, 3.2)  | 0.85 (0.62, 1.18)                            | 0.3 (0.12, 0.73)   | 0.68 (0.22, 2.09) | 1.18 (0.51, 2.71) |

a. Outcomes in subgroups of recipients of kidneys from matched donors receiving different modalities or durations of dialysis were compared with recipients from matched donors not receiving dialysis.

b. Logistic and Cox proportional hazard regression models are adjusted for: cold ischemic time, recipient age, BMI, diabetes as the cause of recipient ESKD, preemptive transplant status, previous kidney transplant, HLA mismatch level, panel reactive antibody categories (0%, 1-20%, 21-80%, and >80%), and donor admission eGFR. Sandwich estimators are used to account for pairs of donor kidneys.



**eTable 7.** Recipient outcomes after kidney transplantation from all donors receiving and not receiving dialysis

| Recipient Groups                                                       |                             | Recipient Outcomes |                           |                         |                           |                              |                           |              |                           |
|------------------------------------------------------------------------|-----------------------------|--------------------|---------------------------|-------------------------|---------------------------|------------------------------|---------------------------|--------------|---------------------------|
|                                                                        |                             | DGF                |                           | All-cause graft failure |                           | Death-censored graft failure |                           | Death        |                           |
|                                                                        |                             | N (%)              | aOR (95% CI) <sup>a</sup> | per 1,000 py            | aHR (95% CI) <sup>a</sup> | per 1,000 py                 | aHR (95% CI) <sup>a</sup> | per 1,000 py | aHR (95% CI) <sup>a</sup> |
| <b>Recipients of all donors not receiving dialysis (N=91,487)</b>      |                             | 23465 (25.6%)      | Reference                 | 55.2                    |                           | 27.6                         | Reference                 | 34.9         | Reference                 |
| <b>Recipients of all donors receiving dialysis<sup>b</sup> (n=969)</b> |                             | 577 (59.5%)        | 4.87 (4.16, 5.71)         | 42.9                    | 0.88 (0.74, 1.05)         | 22.5                         | 1 (0.79, 1.26)            | 24.3         | 0.76 (0.61, 0.96)         |
| <b>Stratified by dialysis indication<sup>c</sup></b>                   | <b>AKI (N=737)</b>          | 504 (68.4%)        | 7.19 (5.99, 8.63)         | 42.9                    | 0.87 (0.7, 1.08)          | 20.9                         | 0.95 (0.72, 1.26)         | 24.4         | 0.76 (0.58, 0.99)         |
|                                                                        | <b>Intoxication (N=138)</b> | 30 (21.7%)         | 0.93 (0.56, 1.53)         | 42.2                    | 0.83 (0.53, 1.31)         | 24.6                         | 1.03 (0.57, 1.85)         | 20.3         | 0.68 (0.37, 1.24)         |
|                                                                        | <b>Other (N=94)</b>         | 43 (45.7%)         | 2.62 (1.59, 4.32)         | 40.4                    | 1.04 (0.67, 1.6)          | 33                           | 1.29 (0.74, 2.27)         | 31.5         | 0.92 (0.51, 1.67)         |
| <b>Stratified by dialysis modality<sup>c</sup></b>                     | <b>HD (N=387)</b>           | 200 (51.7%)        | 3.44 (2.67, 4.44)         | 45                      | 0.93 (0.71, 1.22)         | 25.1                         | 1.1 (0.78, 1.55)          | 23.6         | 0.75 (0.53, 1.06)         |
|                                                                        | <b>CRRT (N=541)</b>         | 351 (64.9%)        | 6.19 (5.04, 7.61)         | 41.5                    | 0.85 (0.67, 1.09)         | 21.3                         | 0.95 (0.69, 1.33)         | 23.5         | 0.75 (0.54, 1.04)         |
|                                                                        | <b>Both (N=25)</b>          | 17 (68%)           | 9.25 (3.35, 25.52)        | 56.5                    | 0.93 (0.39, 2.22)         | 22.6                         | 1.1 (0.38, 3.23)          | 42.9         | 0.89 (0.33, 2.4)          |
|                                                                        | <b>Unknown (N=16)</b>       | 9 (56.2%)          | 4.58 (1.41, 14.85)        | 28.3                    | 0.6 (0.22, 1.61)          | 9.4                          | 0.37 (0.05, 2.57)         | 28.3         | 1.1 (0.4, 3.05)           |
| <b>Stratified by dialysis duration<sup>c</sup></b>                     | <b>≤ 3 days (N=701)</b>     | 396 (56.5%)        | 4.45 (3.69, 5.37)         | 46                      | 0.96 (0.78, 1.17)         | 23.2                         | 1.04 (0.79, 1.36)         | 27           | 0.87 (0.68, 1.12)         |
|                                                                        | <b>4-7 days (N=188)</b>     | 138 (73.4%)        | 7.82 (5.55, 11.03)        | 28.2                    | 0.52 (0.31, 0.87)         | 19.4                         | 0.81 (0.45, 1.48)         | 11.9         | 0.3 (0.13, 0.71)          |
|                                                                        | <b>&gt;7 days (N=42)</b>    | 24 (57.1%)         | 4.71 (2.28, 9.73)         | 41.5                    | 0.92 (0.36, 2.37)         | 20.8                         | 0.96 (0.3, 3.01)          | 20.4         | 0.72 (0.23, 2.2)          |
|                                                                        | <b>Unknown (N=38)</b>       | 19 (50%)           | 3.25 (1.34, 7.88)         | 51.7                    | 1.06 (0.51, 2.2)          | 25.9                         | 1.09 (0.4, 2.95)          | 31.8         | 1.02 (0.45, 2.3)          |

a. Logistic and Cox proportional hazard regression models are adjusted for: donor age, sex, Black race, admission eGFR, BMI, hypertension, diabetes, dcd status, stroke as cause of death, Hepatitis C serostatus, year of transplant (before or after 2015), cold ischemic time, recipient age, BMI, diabetes as the cause of recipient ESKD, preemptive transplant status, previous kidney transplant, HLA mismatch level, panel reactive antibody categories (0%, 1-20%, 21-80%, and >80%). Sandwich estimators are used to account for pairs of donor kidneys.

b. Among recipients of donors receiving dialysis, 3 recipients received kidney transplantation from 2 unmatched donors receiving dialysis and not included in the primary matched analysis.

c. Outcomes in subgroups of recipients of kidneys from matched donors receiving dialysis for different indications, different modalities or durations were compared with recipients from matched donors not receiving dialysis.

**eTable 8.** Recipient kidney function decline after kidney transplantation from all donors receiving vs. not receiving dialysis

| Recipient Groups                                                        |                      | Median (IQR) number of eGFR measurements per person | Median (IQR) duration from transplant to last eGFR measurements (year) | Annual eGFR decline <sup>a, b</sup> |                                   |
|-------------------------------------------------------------------------|----------------------|-----------------------------------------------------|------------------------------------------------------------------------|-------------------------------------|-----------------------------------|
|                                                                         |                      |                                                     |                                                                        | % change per year                   | Difference between group (95% CI) |
| Recipients of all donors not receiving dialysis <sup>c</sup> (N=85,850) |                      | 4 (3, 6)                                            | 3.1 (1.8, 5.4)                                                         | -5.53%                              | Reference                         |
| Recipients of all donors receiving dialysis <sup>c</sup> (n=959)        |                      | 4 (2, 5)                                            | 2.4 (1.1, 4)                                                           | -3.01%                              | 2.52% (1.18%, 3.87%)              |
| Stratified by dialysis indication                                       | AKI (N=734)          | 3 (2, 5)                                            | 2.2 (1.1, 3.9)                                                         | -2.3%                               | 3.23% (-5.64%, 4.8%)              |
|                                                                         | Intoxication (N=134) | 5 (3, 6)                                            | 3.1 (2, 4.9)                                                           | -6.3%                               | -0.78% (1.68%, 2.31%)             |
|                                                                         | Other (N=91)         | 3 (2, 4)                                            | 2 (1, 2.9)                                                             | -1.96%                              | 3.57% (-3.77%, 8.8%)              |
| Stratified by dialysis modality                                         | HD (N=384)           | 4 (3, 5)                                            | 2.8 (1.6, 4)                                                           | -4.5%                               | 1.03% (-7.36%, 3.03%)             |
|                                                                         | CRRT (N=536)         | 3 (2, 5)                                            | 2 (1, 3.7)                                                             | -1.86%                              | 3.67% (-0.81%, 5.59%)             |
|                                                                         | Both (N=23)          | 4 (2.75, 5.25)                                      | 3 (1.3, 4.1)                                                           | -2.73%                              | 2.79% (-5.05%, 11.28%)            |
|                                                                         | Unknown (N=15)       | 6 (4.5, 9)                                          | 5.7 (3.4, 8.7)                                                         | -0.11%                              | 5.42% (-2.67%, 14.17%)            |
| Stratified by dialysis duration                                         | ≤3 days (N=692)      | 4 (2, 5)                                            | 2.5 (1.1, 4)                                                           | -3.19%                              | 2.34% (0.79%, 3.91%)              |
|                                                                         | 4-7 days (N=188)     | 3 (2, 5)                                            | 2 (1, 3.8)                                                             | -0.63%                              | 4.9% (1.61%, 8.29%)               |
|                                                                         | >7 days (N=41)       | 4 (3, 5)                                            | 2.5 (1.1, 4)                                                           | -6.58%                              | -1.06% (-6.93%, 5.19%)            |
|                                                                         | Unknown (N=38)       | 4 (3, 6)                                            | 3.1 (1.5, 5)                                                           | -5.1%                               | 0.43% (-5.39%, 6.61%)             |

a. Linear mixed-effects models are used to estimate kidney function decline over time, interaction terms between donor dialysis status and time are used to determine the difference in the rate of kidney function decline between recipients from donors receiving dialysis vs. matched donors not receiving dialysis. The fixed-effects coefficient of time factor in linear mixed-effects models represents % change per year in recipients of matched donors not receiving dialysis, and the linear combination of the fixed-effects coefficients of time and time-dialysis interactions represent % change per year in recipients of donors receiving dialysis.

b. For recipients who developed graft failure, eGFR was imputed as 10 ml/min/1.73m<sup>2</sup> at the time of graft failure; for recipients who developed primary nonfunctioning, eGFR was imputed as 10 ml/min/1.73m<sup>2</sup> at the time of transplant.

c. In the UNOS Kidney-Pancreas Individual Follow-up data released in July 2023, 5,637 (6.2%) recipients of donors not receiving dialysis and 10 (1.0%) recipients of donors receiving dialysis had no follow up creatinine and did not develop graft failure before 1/31/2020, thus, were excluded from the longitudinal analysis
