# Supplementary material
Source: PubMed Central journal article supplement (PMC11117155)
Supplement: jama-e248469-s002.pdf [file jama-e248469-s002.pdf]

## Data Sharing Statement

Wen. Kidney Transplant Outcomes From Deceased Donors Who Received Dialysis. *JAMA*.  
Published May 23, 2024. doi:10.1001/jama.2024.8469

### Data

**Data available:** No

### Additional Information

**Explanation for why data not available:** This study utilizes individual level protected health information from the United Network for Organ Sharing, thus will not be made publicly available. The corresponding author could be contacted for deidentified analytical data.
